1 **Expression of soluble methane monooxygenase in *Escherichia coli* enables methane**  
2 **conversion**

3

4 R. Kyle Bennett<sup>1,2†</sup>, Nyaradzo Dzvova<sup>3†</sup>, Michael Dillon<sup>1,2</sup>, Stephanie Jones<sup>3</sup>, Kelley Hestmark<sup>3</sup>,  
5 Baolong Zhu<sup>3</sup>, Noah Helman<sup>3</sup>, Derek Greenfield<sup>3</sup>, Elizabeth Clarke<sup>3\*</sup>, Eleftherios T.  
6 Papoutsakis<sup>1,2\*</sup>

7

8 **Affiliations:**

9 <sup>1</sup>Department of Chemical and Biomolecular Engineering, University of Delaware, Newark, DE,  
10 USA.

11 <sup>2</sup>The Delaware Biotechnology Institute, University of Delaware, Newark, DE, USA.

12 <sup>3</sup>Industrial Microbes, Alameda, CA, USA.

13

14 \*Correspondence to: [liz@imicrobes.com](mailto:liz@imicrobes.com) (EC), [epaps@udel.edu](mailto:epaps@udel.edu) (ETP).

15 †These authors contributed equally to this work.

16        **Abstract**

17        Natural gas and biogas provide an opportunity to harness methane as an industrial feedstock.  
18        Bioconversion is a promising alternative to chemical catalysis, which requires extreme operating  
19        conditions and exhibits poor specificities. Though methanotrophs natively utilize methane,  
20        efforts have been focused on engineering platform organisms like *Escherichia coli* for synthetic  
21        methanotrophy. Here, a synthetic *E. coli* methanotroph was developed by engineering functional  
22        expression of the *Methylococcus capsulatus* soluble methane monooxygenase *in vivo* via  
23        expression of its cognate GroESL chaperone. Additional overexpression of *E. coli* GroESL  
24        further improved activity. Incorporation of an acetone formation pathway then enabled the  
25        conversion of methane to acetone *in vivo*, as validated via <sup>13</sup>C tracing. This work provides the  
26        first reported demonstration of methane bioconversion to liquid chemicals in a synthetic  
27        methanotroph.

## 28 Introduction

29 Abundant and recoverable reserves of natural gas, as well as increased biogas generation, has  
30 provided the economic and environmental opportunity to utilize methane as an industrial  
31 feedstock for liquid fuel and chemical production <sup>1</sup>. Compared to chemical conversion of  
32 methane to liquid fuels and chemicals via catalysis, which require extreme operating conditions  
33 and exhibit poor specificities, biological conversion of methane is a promising alternative <sup>2</sup>.  
34 Though native methanotrophs possess the ability to utilize methane, engineering synthetic  
35 methane utilization in established platform hosts like *Escherichia coli* is preferred industrially <sup>3</sup>.  
36 Though many groups have established synthetic *E. coli* methylotrophs that possess the ability to  
37 utilize methanol <sup>4-7</sup>, no one has yet established a synthetic *E. coli* methanotroph that possesses  
38 the ability to utilize methane *in vivo*. Recently, it was shown that the particulate methane  
39 monooxygenase (pMMO) retained enzymatic activity *in vitro* after expression in *E. coli* and  
40 purification <sup>8</sup>. However, *in vivo* methane bioconversion in *E. coli* remains a significant challenge  
41 despite multiple efforts.

42 Here, we engineered the functional expression of the soluble methane monooxygenase  
43 (sMMO) to achieve the first step in the synthetic methanotrophic pathway: conversion of  
44 methane to methanol. Heterologous expression of the full and functional sMMO has been  
45 notoriously intractable <sup>9,10</sup>. The six-subunit enzyme forms a dynamic complex that turns methane  
46 and molecular oxygen into methanol and water, using NADH as an electron donor (Fig. 1A).  
47 MmoXYZ form the hydroxylase, which contains a non-heme, di-iron catalytic center; it has  
48 never been functionally expressed in a non-methylotrophic host, and solubility has been  
49 identified as one potential cause <sup>9,11</sup> The reductase, MmoC, and a regulatory protein, MmoB,

50 have been successfully expressed, and the last component, MmoD, inhibits sMMO activity when  
51 supplemented to lysates but its exact physiological role has yet to be determined<sup>10,12,13</sup>.

52 Notably, there has been success in transferring active sMMO into heterologous  
53 methylotrophs. Lloyd, et al. demonstrated that a plasmid containing DNA from the *Ms.*  
54 *trichosporium* OB3b sMMO genomic locus conferred sMMO activity to *Mcy. parvus* OBBP and  
55 in *Mm. album* BG8, two organisms which only contain the particulate form of the MMO<sup>14</sup>.  
56 Though it is possible that additional genes in the recipient organisms contributed to sMMO  
57 activity, these results suggest that the complete set of genes necessary for sMMO expression and  
58 activity might be found in a single genomic locus. This and related approaches have enabled the  
59 mutagenesis and characterization of the hydroxylase component of the sMMO<sup>15,16</sup>.

60

## 61 **Results**

### 62 ***Protein-folding chaperones enhance sMMO expression***

63 Until now, the sMMO had not been actively expressed in *E. coli*. We suspected that the key to  
64 achieving functional expression was to test large sets of candidate sequences, including well-  
65 characterized MMO operons and protein-folding chaperones that might improve solubility. In  
66 natural methanotrophs, the genes encoding sMMO are most often found with genes encoding  
67 GroEL in the same operon, which suggested to us that this chaperone system in particular might  
68 be critical for proper sMMO expression. We synthesized a total of 17 candidate monooxygenases  
69 including methane monooxygenases, and monooxygenases for ethane, propane, alkene, and  
70 toluene (Table S1). We synthesized *groEL-ES* operons from the same organisms and designed a  
71 two-plasmid expression system that would allow us to test different combinations of

72 monooxygenases and chaperones. We screened these using a sensitive fluorescent assay that  
73 relies on the promiscuity of the sMMO towards an alternate substrate: coumarin<sup>17</sup>. We  
74 hypothesized that other functional soluble di-iron monooxygenases might also hydroxylate  
75 coumarin to umbelliferone, which can be measured via fluorescence.

76 We identified four active clones, demonstrating an active sMMO *in vivo*; characterization  
77 of these strains indicates that protein folding chaperones play a significant role in sMMO  
78 activity. Through sequencing analysis, these clones were shown to contain sMMO homologues  
79 from three different organisms, paired with either their cognate or non-cognate GroESL  
80 chaperones<sup>18</sup>. Strains were validated for activity on methane by exposing cells in serum bottles  
81 to methane (supplementary methods) and quantifying methanol titers. We selected the highest-  
82 activity pair, the *M. capsulatus* (Bath) sMMO with its cognate GroESL chaperone, for further  
83 optimization. We hypothesized that the chaperones have a positive and necessary impact on the  
84 solubility of the sMMO complex. As shown in Fig. 1B, the *M. capsulatus* sMMO rate on  
85 methane depends on the expression of *M. capsulatus* GroESL2. Interestingly, expression of *M.*  
86 *capsulatus* GroEL2 alone is sufficient to generate a functional MMO, suggesting that the *M.*  
87 *capsulatus* GroEL2 forms a functional chaperone with *E. coli* GroES. Additional over-  
88 expression of *E. coli* GroESL further improved activity (Fig. 1B). Next, we sought to validate  
89 that chaperone expression indeed improves the solubility of sMMO. To do this, we expressed the  
90 entire operon with only one of the six subunits (*mmoXYBZCD*) his tagged, and the rest untagged.  
91 A total of 12 strains were constructed in order to combine each of the six plasmid constructs with  
92 or without a chaperone plasmid. As shown in Fig. 1C, the amount of soluble MmoX and MmoY  
93 increases dramatically when *M. capsulatus* GroESL2 is expressed. Additional bands are  
94 observed for his-tagged MmoX, suggesting some degradation products. Minimizing degradation

95 could improve overall activity and is currently being explored. Other subunits are only  
96 moderately impacted (Fig. S1) and are soluble even without chaperone expression.

### 97 ***Improving sMMO activity via directed evolution***

98 We next improved sMMO activity via directed evolution. We generated a full site-saturation  
99 mutagenesis library on all six subunits of the sMMO operon (*mmoXYBZDC*) and the *groEL-2*  
100 gene. All 2,237 amino acids in these 7 polypeptides were mutated one at a time to all other 19  
101 amino acids<sup>19</sup>. A total of ~32,000 clones from this library were screened using the coumarin  
102 assay, representing an approximate coverage of ca. 50%. Many mutations were discovered that  
103 improved the rate of methane bioconversion above that of the wild-type enzyme; over 400 hits  
104 with improved activity were identified and validated<sup>20</sup>. Of these, we picked 50 to recombine in a  
105 combination library, targeting an average incorporation rate of 5 mutations per library member.  
106 Coumarin data for these 50 mutants are shown in Figure 2A. This combination library was  
107 screened and the hits were validated for methane bioconversion (Figs. 2B-C). The best mutant  
108 from this library contained 5 mutations: MmoX<sup>V23G,T356G</sup>, MmoZ<sup>R70E</sup>, MmoB<sup>Y139S</sup> and  
109 GroEL2<sup>N409G</sup>. It is currently unclear why these mutations improve methane oxidation, but due to  
110 the solubility issues, one hypothesis is that these mutations enhance the expression/solubility of  
111 the sMMO in the heterologous host. Finally, we moved this sMMO expression system into a set  
112 of *E. coli* strains that have mutations beneficial for folding and expressing challenging proteins  
113 (Table S2). The highest activity was found in OverExpress™ C43(DE3) (Figs. 2B-C), which  
114 exhibited a rate of  $85 \pm 2$  mg methanol·g<sub>CDW</sub><sup>-1</sup>·h<sup>-1</sup>. In comparison, natural methanotrophs  
115 expressing the sMMO have a reported rate of 100 to 1000 mg methanol·g<sub>CDW</sub><sup>-1</sup>·h<sup>-1</sup><sup>21-24</sup>.

116 *E. coli* expression of the sMMO is a flexible and highly engineerable system for  
117 understanding and modifying this enzyme, that has advantages over the only other plasmid based

118 heterologous expression system for this enzyme<sup>11</sup>. Using this *E. coli* based system, we have  
119 shown the ability to change the substrate specificity for methane and ethane with a single  
120 mutation: MmoX<sup>E240N</sup> (Table S3). By adding suitable origins to the sMMO plasmid, we  
121 demonstrated the sMMO exhibits *in vivo* activity in other, industrially relevant heterologous  
122 hosts as well, including *Pichia pastoris* (Fig. S3)<sup>18</sup>. However, for the purposes of this study, we  
123 chose to focus on *E. coli* since there has been much more synthetic methylotrophy research  
124 performed in *E. coli* compared to other heterologous hosts.

### 125 ***Conversion of methane to liquid chemicals in vivo***

126 To examine if methane could be converted to liquid chemicals by a non-native methanotroph, we  
127 transformed the sMMO-expressing plasmid (pNH284) into a previously engineered *E. coli* strain  
128 ( $\Delta frmA\Delta pgi$  + pUD11) that co-utilizes methanol and glucose for acetone production<sup>25,26</sup>.

129 Expression of the functional sMMO in this strain realized the ability to co-utilize methane and  
130 glucose for acetone production (Fig. 3A). As demonstrated by the fermentation data with <sup>13</sup>CH<sub>4</sub>  
131 (and the N<sub>2</sub> control) atmospheres, this engineered *E. coli* strain ( $\Delta frmA\Delta pgi$  + pUD11 +  
132 pNH284) can convert methane and glucose to acetone (Figs. 3B-C, S3, S4). Although metabolite  
133 titers were similar between the two conditions (ca. 8 mM acetone for N<sub>2</sub> and <sup>13</sup>CH<sub>4</sub>), <sup>13</sup>C tracing  
134 revealed that methane-derived carbon was used to partially produce acetone. When using a <sup>13</sup>CH<sub>4</sub>  
135 atmosphere (Fig. 3D), the average carbon labeling in acetone was  $9.1 \pm 1.3\%$ , which is  
136 significantly higher than the  $1.9 \pm 0.8\%$  average carbon labeling when using a N<sub>2</sub> atmosphere.  
137 The latter is similar to expected natural abundance (ca. 1.1%). As expected, <sup>13</sup>C tracing revealed  
138 that the inactive sMMO control strain was unable to convert <sup>13</sup>C-methane carbon to acetone (Fig.  
139 S5).

140           Since methane-dependence is not established with only  $\Delta pgi$ , i.e.,  $\Delta pgi$  can still utilize  
141 glucose in the absence of methane, it is difficult to predict the expected  $^{13}\text{C}$  labeling pattern,  
142 though M+1 mass isotopomers should be most prevalent. However, the average carbon labeling  
143 in acetone was higher when using  $^{13}\text{C}$ -methane and glucose compared to that from  $^{13}\text{C}$ -methanol  
144 and glucose in a non-sMMO-expressing strain ( $2.4 \pm 0.3\%$ )<sup>25</sup>, suggesting that *E. coli* may be  
145 better equipped for methane utilization. Furthermore, the relative abundance of acetone mass  
146 isotopomers reveals that  $^{13}\text{C}$  labeling is primarily M+1 (Figs. 3E, S5; 1-M0=25%), which is  
147 expected based on the co-utilization scheme that  $\Delta pgi$  creates. Several engineering strategies can  
148 be used to increase the degree of methane conversion. One such strategy is to engineer a  
149 methane-dependent strain that co-utilizes methane and a sugar in a one-to-one molar ratio.  
150 Several methanol-dependent *E. coli* methylotrophs have been developed<sup>27-29</sup>. Under these  
151 dependent conditions, the average  $^{13}\text{C}$  labeling in acetone increases to 33%<sup>27</sup>. Alternatively,  
152 tuning the native or a heterologous non-oxidative PPP for increased cycling would generate  
153 higher order Ru5P mass isotopomers, which leads to improved methane utilization<sup>25,30</sup>.

154

## 155 **Discussion**

156 Ongoing efforts to improve the system towards commercially relevant MMO rates (400-500 mg  
157 methanol·g<sub>CDW</sub><sup>-1</sup>·h<sup>-1</sup>) include expression balancing the GroESL chaperones, incorporating  
158 overexpression of additional protein folding chaperones, and additional rounds of directed  
159 evolution on the sMMO itself. The strategy used here could be applied to other difficult-to-  
160 express enzymes, including cytochromes P450. The sMMO has broad substrate specificity,  
161 making it an attractive catalyst for other biotechnology applications; the ability to engineer the  
162 substrate specificity is especially important here<sup>31</sup>. Finally, the system described can be used to



163 understand other aspects of this fascinating enzyme, including testing mechanistic hypotheses for  
164 the catalytic cycle and participation of key residues. Ultimately, autonomous synthetic  
165 methanotrophy, i.e., the ability to utilize methane as the sole carbon and energy source, is  
166 desirable and may be realized via further engineering efforts or adaptive laboratory evolution  
167 (ALE). One such strategy is to equip a true *E. coli* methylotroph<sup>32</sup>, achieved via ALE, with the  
168 sMMO. However, further engineering and evolutionary efforts will likely be required to obtain a  
169 robust *E. coli* methanotroph. Together, this study provides the first reported demonstration of *in*  
170 *vivo* methane bioconversion to liquid fuels and chemicals in a synthetic methanotroph and  
171 establishes the next step toward realizing industrial methane bioconversion.

172

### 173 **Acknowledgements**

174 This work was supported by the Advanced Research Projects Agency-Energy (ARPA-E)  
175 Reducing Emissions using Methanotrophic Organisms for Transportation Energy (REMOTE)  
176 program (DE-AR0000432). This publication is based upon work supported by the Climate  
177 Change and Emissions Management (CCEMC) Corporation/Emissions Reductions Alberta under  
178 Project K130103 and the National Science Foundation under Grant No. 1520425. Gen9, Inc.  
179 (Ginkgo Bioworks) provided Materials for this work under the 2014 G-Prize. The authors would  
180 like to kindly thank Dr. Gwendolyn Gregory for assistance with GC-FID analysis.

181

### 182 **Author Contributions**

183 RKB, ND, BZ, NH, DG, EC and ETP designed the research. RKB, ND, MD, SJ, KH, BZ, NH,  
184 DG and EC conducted the experiments. RKB, ND, EC and ETP analyzed the data and wrote the  
185 manuscript. All authors read and approved the manuscript.

186

187 **Competing Interests**

188 All Industrial Microbes authors are shareholders in the company.

189

## References

- 190 1 Haynes, C. A. & Gonzalez, R. Rethinking biological activation of methane and conversion  
191 to liquid fuels. *Nat Chem Biol* **10**, 331-339, doi:10.1038/nchembio.1509 (2014).
- 192 2 Whitaker, W. B., Sandoval, N. R., Bennett, R. K., Fast, A. G. & Papoutsakis, E. T.  
193 Synthetic methylotrophy: engineering the production of biofuels and chemicals based on  
194 the biology of aerobic methanol utilization. *Curr Opin Biotechnol* **33**, 165-175,  
195 doi:10.1016/j.copbio.2015.01.007 (2015).
- 196 3 Bennett, R. K., Steinberg, L. M., Chen, W. & Papoutsakis, E. T. Engineering the  
197 bioconversion of methane and methanol to fuels and chemicals in native and synthetic  
198 methylotrophs. *Curr Opin Biotechnol* **50**, 81-93, doi:10.1016/j.copbio.2017.11.010 (2018).
- 199 4 Bennett, R. K. *et al.* Triggering the stringent response enhances synthetic methanol  
200 utilization in *Escherichia coli*. *Metab Eng* **61**, 1-10, doi:10.1016/j.ymben.2020.04.007  
201 (2020).
- 202 5 Woolston, B. M., King, J. R., Reiter, M., Van Hove, B. & Stephanopoulos, G. Improving  
203 formaldehyde consumption drives methanol assimilation in engineered *E. coli*. *Nature*  
204 *Communications* **9**, 2387, doi:10.1038/s41467-018-04795-4 (2018).
- 205 6 Whitaker, W. B. *et al.* Engineering the biological conversion of methanol to specialty  
206 chemicals in *Escherichia coli*. *Metab Eng* **39**, 49-59, doi:10.1016/j.ymben.2016.10.015  
207 (2017).
- 208 7 Muller, J. E. N. *et al.* Engineering *Escherichia coli* for methanol conversion. *Metab Eng*  
209 **28**, 190-201, doi:10.1016/j.ymben.2014.12.008 (2015).
- 210 8 Kim, H. J. *et al.* Biological conversion of methane to methanol through genetic reassembly  
211 of native catalytic domains. *Nature Catalysis* **2**, 342-353, doi:10.1038/s41929-019-0255-1  
212 (2019).
- 213 9 Banerjee, R., Jones, J. C. & Lipscomb, J. D. Soluble Methane Monooxygenase. *Annu Rev*  
214 *Biochem* **88**, 409-431, doi:10.1146/annurev-biochem-013118-111529 (2019).
- 215 10 West, C. A., Salmond, G. P., Dalton, H. & Murrell, J. C. Functional expression in  
216 *Escherichia coli* of proteins B and C from soluble methane monooxygenase of  
217 *Methylococcus capsulatus* (Bath). *J Gen Microbiol* **138**, 1301-1307,  
218 doi:10.1099/00221287-138-7-1301 (1992).
- 219 11 Murrell, J. C., Gilbert, B. & McDonald, I. R. Molecular biology and regulation of methane  
220 monooxygenase. *Arch Microbiol* **173**, 325-332, doi:10.1007/s002030000158 (2000).
- 221 12 Kim, H. *et al.* MMOD-induced structural changes of hydroxylase in soluble methane  
222 monooxygenase. *Sci Adv* **5**, eaax0059, doi:10.1126/sciadv.aax0059 (2019).
- 223 13 Merckx, M. & Lippard, S. J. Why OrfY? Characterization of MMOD, a long overlooked  
224 component of the soluble methane monooxygenase from *Methylococcus capsulatus* (Bath).  
225 *J Biol Chem* **277**, 5858-5865, doi:10.1074/jbc.M107712200 (2002).
- 226 14 Lloyd, J. S., De Marco, P., Dalton, H. & Murrell, J. C. Heterologous expression of soluble  
227 methane monooxygenase genes in methanotrophs containing only particulate methane  
228 monooxygenase. *Archives of Microbiology* **171**, 364-370, doi:10.1007/s002030050723  
229 (1999).
- 230 15 Smith, T. J. & Murrell, J. C. in *Methods in Enzymology: Methods in Methane Metabolism*,  
231 *Vol 495, Pt B Methods in Enzymology* (eds A. C. Rosenzweig & S. W. Ragsdale) 135-  
232 147 (2011).

- 233 16 Smith, T. J., Slade, S. E., Burton, N. P., Murrell, J. C. & Dalton, H. Improved system for  
234 protein engineering of the hydroxylase component of soluble methane monooxygenase.  
235 *Applied and Environmental Microbiology* **68**, 5265-5273, doi:10.1128/aem.68.11.5265-  
236 5273.2002 (2002).
- 237 17 Miller, A. R., Keener, W. K., Watwood, M. E. & Roberto, F. F. A rapid fluorescence-based  
238 assay for detecting soluble methane monooxygenase. *Appl Microbiol Biotechnol* **58**, 183-  
239 188, doi:10.1007/s00253-001-0885-4 (2002).
- 240 18 Clarke, E. J., Zhu, B., Greenfield, D. L., Jones, S. R. & Helman, N. C. Functional  
241 Expression of Monooxygenases and Methods of Use. *WO/2017/087731* (2017).
- 242 19 Erijman, A., Dantes, A., Bernheim, R., Shifman, J. M. & Peleg, Y. Transfer-PCR (TPCR):  
243 a highway for DNA cloning and protein engineering. *J Struct Biol* **175**, 171-177,  
244 doi:10.1016/j.jsb.2011.04.005 (2011).
- 245 20 Clarke, E. J., Greenfield, D. L., Helman, N. C., Jones, S. R. & Zhu, B. Improved methane  
246 monooxygenase enzymes. *WO/2019/010455A1* (2019).
- 247 21 Carlsen, H. N., Joergensen, L. & Degn, H. Inhibition by ammonia of methane utilization  
248 in *Methylococcus capsulatus* (Bath). *Applied Microbiology and Biotechnology* **35**, 124-  
249 127, doi:10.1007/BF00180649 (1991).
- 250 22 Fox, B. G., Froland, W. A., Dege, J. E. & Lipscomb, J. D. Methane monooxygenase from  
251 *Methylosinus trichosporium* OB3b. Purification and properties of a three-component  
252 system with high specific activity from a type II methanotroph. *J Biol Chem* **264**, 10023-  
253 10033 (1989).
- 254 23 Colby, J., Stirling, D. I. & Dalton, H. The soluble methane mono-oxygenase of  
255 *Methylococcus capsulatus* (Bath). Its ability to oxygenate n-alkanes, n-alkenes, ethers, and  
256 alicyclic, aromatic and heterocyclic compounds. *Biochem J* **165**, 395-402,  
257 doi:10.1042/bj1650395 (1977).
- 258 24 Harwood, J. H. & Pirt, S. J. Quantitative Aspects of Growth of the Methane Oxidizing  
259 Bacterium *Methylococcus capsulatus* on Methane in Shake Flask and Continuous  
260 Chemostat Culture. *Journal of Applied Bacteriology* **35**, 597-607, doi:10.1111/j.1365-  
261 2672.1972.tb03741.x (1972).
- 262 25 Bennett, R. K., Gonzalez, J. E., Whitaker, W. B., Antoniewicz, M. R. & Papoutsakis, E. T.  
263 Expression of heterologous non-oxidative pentose phosphate pathway from *Bacillus*  
264 *methanolicus* and phosphoglucose isomerase deletion improves methanol assimilation and  
265 metabolite production by a synthetic *Escherichia coli* methylotroph. *Metab Eng* **45**, 75-85,  
266 doi:10.1016/j.ymben.2017.11.016 (2018).
- 267 26 Bermejo, L. L., Welker, N. E. & Papoutsakis, E. T. Expression of *Clostridium*  
268 *acetobutylicum* ATCC 824 genes in *Escherichia coli* for acetone production and acetate  
269 detoxification. *Appl Environ Microbiol* **64**, 1079-1085 (1998).
- 270 27 Bennett, R. K. *et al.* Engineering *Escherichia coli* for methanol-dependent growth on  
271 glucose for metabolite production. *Metab Eng* **60**, 45-55,  
272 doi:10.1016/j.ymben.2020.03.003 (2020).
- 273 28 Meyer, F. *et al.* Methanol-essential growth of *Escherichia coli*. *Nat Commun* **9**, 1508,  
274 doi:10.1038/s41467-018-03937-y (2018).
- 275 29 Chen, C. T. *et al.* Synthetic methanol auxotrophy of *Escherichia coli* for methanol-  
276 dependent growth and production. *Metab Eng* **49**, 257-266,  
277 doi:10.1016/j.ymben.2018.08.010 (2018).

- 278 30 Rohlhill, J., Gerald Har, J. R., Antoniewicz, M. R. & Papoutsakis, E. T. Improving  
279 synthetic methylotrophy via dynamic formaldehyde regulation of pentose phosphate  
280 pathway genes and redox perturbation. *Metab Eng* **57**, 247-255,  
281 doi:10.1016/j.ymben.2019.12.006 (2020).
- 282 31 Smith, T. J. & Dalton, H. Vol. 151 *Studies in Surface Science and Catalysis*. (ed Rafael  
283 Vazquez-Duhalt & Rodolfo Quintero-Ramirez) 177-192 (Elsevier, 2004).
- 284 32 Chen, F. Y., Jung, H. W., Tsuei, C. Y. & Liao, J. C. Converting *Escherichia coli* to a  
285 Synthetic Methylotroph Growing Solely on Methanol. *Cell* **182**, 933-946 e914,  
286 doi:10.1016/j.cell.2020.07.010 (2020).
- 287

288

## Figures

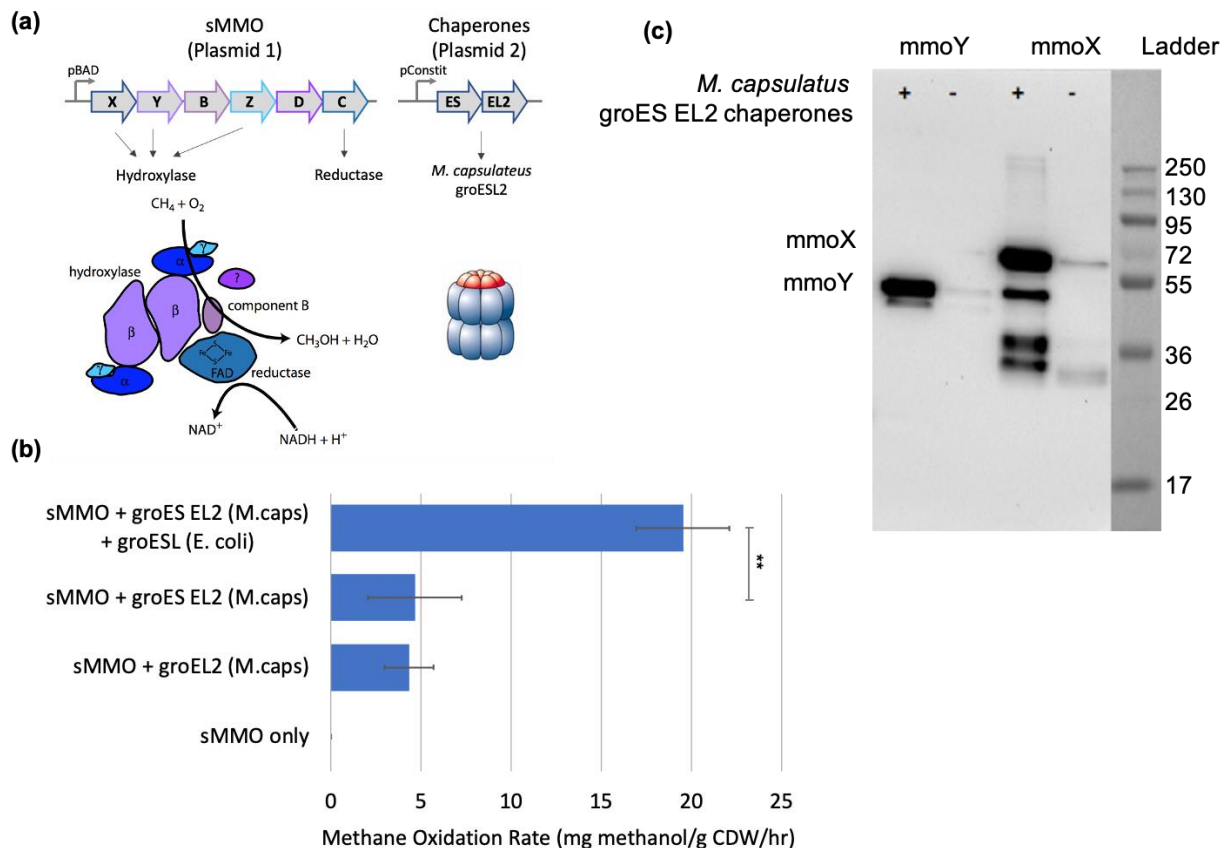

289

290 **Figure 1.** *In vivo* expression of an active soluble methane monooxygenase (sMMO) in *E. coli*.  
 291 (a) Operon structure of the sMMO and folding chaperones. The sMMO converts methane and  
 292 molecular oxygen into methanol and water, using NADH as an electron donor. Expression of  
 293 folding chaperones, GroESL, is essential for MMO activity. GroEL (blue) is composed of two  
 294 stacked seven-membered rings and interacts with the GroES lid (orange) to refold misfolded  
 295 proteins. (b) *M. capsulatus* sMMO rate is chaperone dependent. (c) Expression of GroESL  
 296 chaperones increases the amount of soluble MmoX (60.6 kDa) and MmoY (45.1 kDa). Error  
 297 bars indicate standard error (n=5-6). \*\* p < 0.001. See text for more details.

298

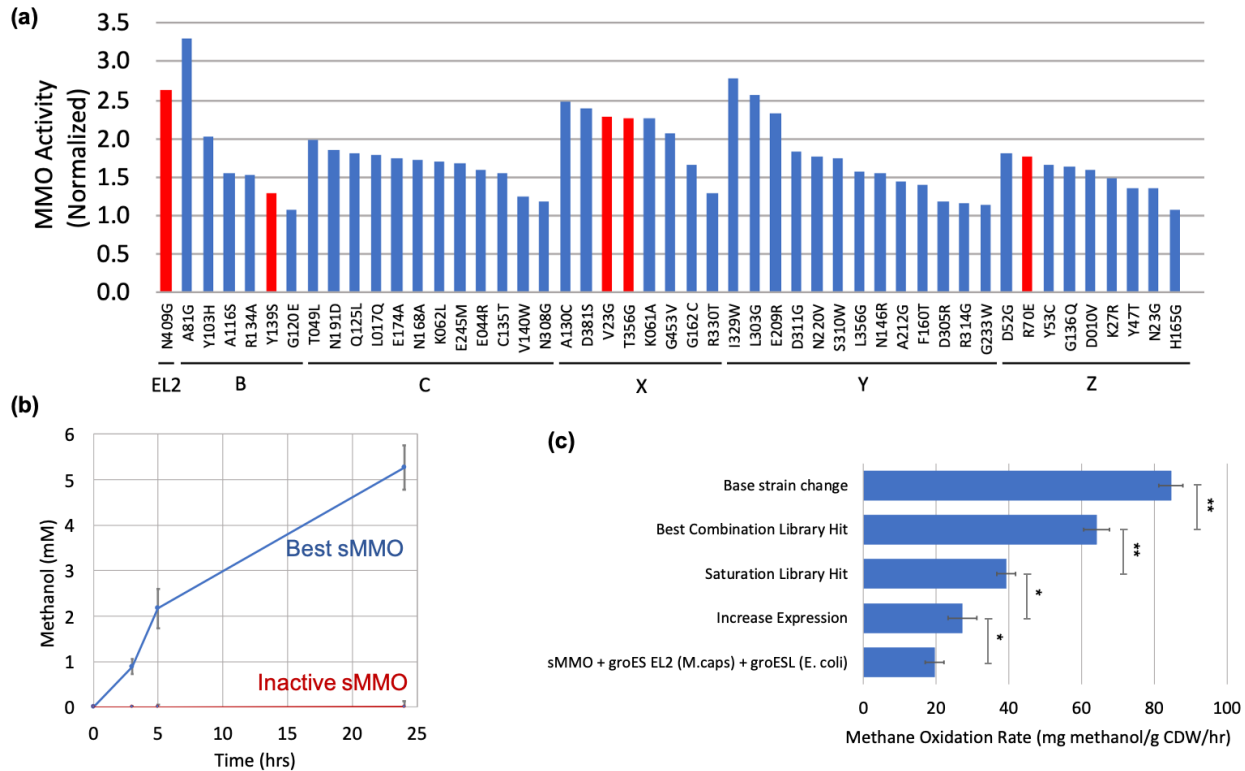

299

300 **Figure 2.** Improvement in sMMO rate via protein engineering. (a) Mutations that improve MMO  
 301 MMO activity were identified by screening a site saturation library. Coumarin activity is  
 302 normalized to a WT sMMO control. These 50 mutations were recombined in a combination  
 303 library targeting an average of 5 mutations across the MMO operon and groEL2. Single point  
 304 mutations found in the best combination library hit are shown in red. (b) *E. coli* expressing  
 305 sMMO from *M. capsulatus* Bath converts methane to methanol. The initial rate between 0 and 3  
 306 hours is used to calculate a methane oxidation rate, which is plotted in panel c. A mutation in the  
 307 catalytic site of MmoX (H246A) makes the enzyme inactive. (c) Improvements to the sMMO  
 308 rate were found by combining the chaperones and the sMMO operon onto a single higher copy  
 309 number plasmid (Fig. S2), and protein engineering via a full site-saturation library and  
 310 combination library. An example of a single point mutation that increased activity found in the  
 311 saturation library is shown here (MmoX<sup>V23G</sup>). The best combination hit was found to be  
 312 MmoX<sup>V23G,T356G</sup>, MmoZ<sup>R70E</sup>, MmoB<sup>Y139S</sup> and GroEL2<sup>N409G</sup>. Expression in a different *E. coli*  
 313 strain (OverExpress) further improved the rate. Error bars indicate standard error (n=5-6). \* p <  
 314 0.005, \*\* p < 0.001. See text for more details.

315

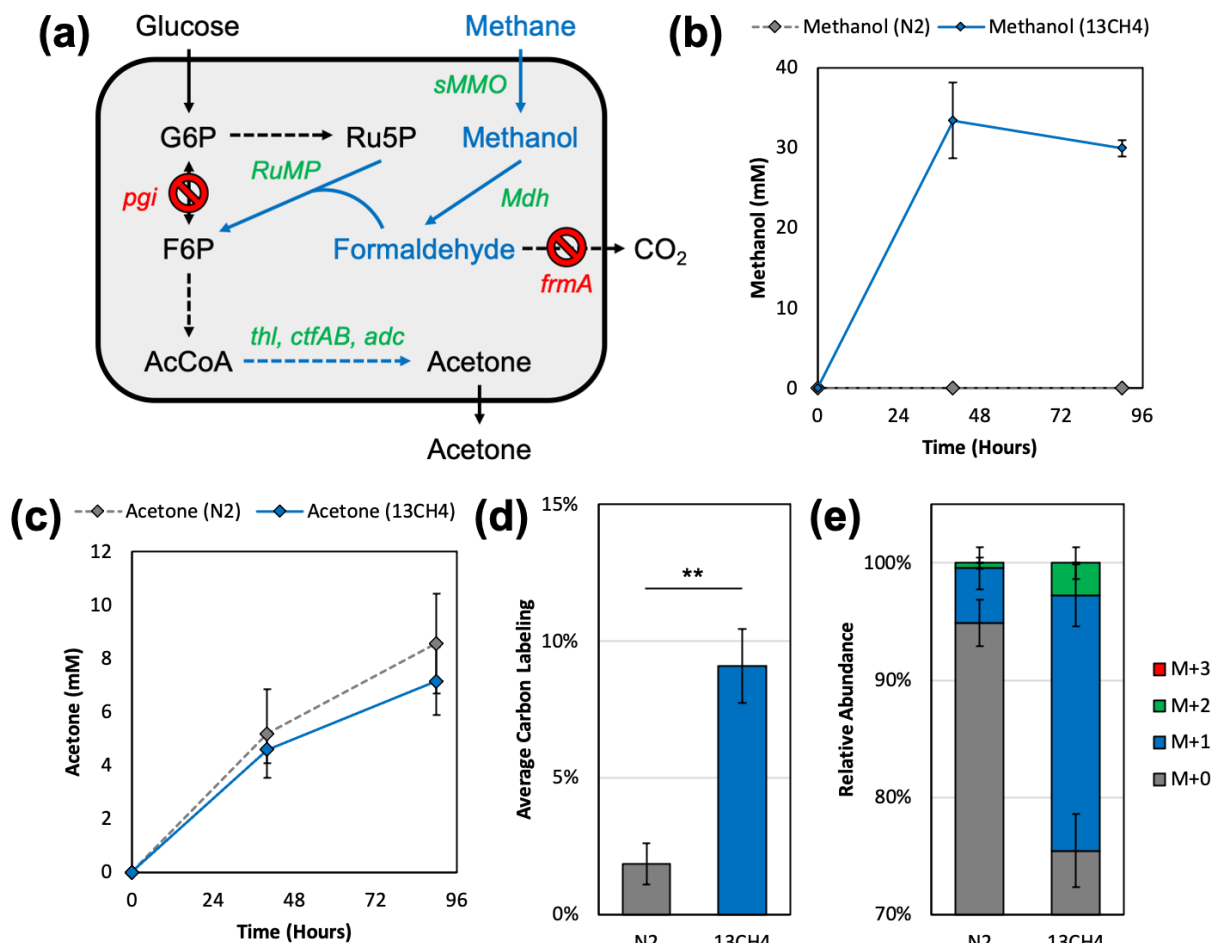

316

317 **Figure 3.** Methane bioconversion to acetone in a synthetic *E. coli* methanotroph. (A) Engineered  
 318 *E. coli* co-utilizes methane and glucose for acetone production via deletion of phosphoglucose  
 319 isomerase (*pgi*) and episomal expression of heterologous genes. Heterologous genes are shown  
 320 in green with their corresponding pathways shown in blue. Production of methanol (B) and  
 321 acetone (C) during gas fermentation. (D) Average <sup>13</sup>C labeling of acetone and (E) relative  
 322 abundance of acetone mass isotopomers at the end of the fermentation (90 hours). Abbreviations:  
 323 sMMO (soluble methane monooxygenase), Mdh (methanol dehydrogenase), RuMP (ribulose  
 324 monophosphate pathway consisting of hexulose phosphate synthase and phosphohexulose  
 325 isomerase), thl (thiolase), ctfAB (CoA transferase), adc (acetoacetate decarboxylase). Error bars  
 326 indicate standard deviation (n=5 for N<sub>2</sub>, n=10 for <sup>13</sup>CH<sub>4</sub>). \*\* p < 0.01. See text for more details.  
 327
